# Supplementary material for: Analysis of health claims regarding creatine monohydrate present in commercial communications for a sample of European sports foods supplements
Source: PubMed Central journal article supplement (PMC11574825; doi:10.1017/s1368980020005121), 2021-01-20
Supplement: S1368980020005121sup001.pdf [file S1368980020005121sup001.pdf]

Appendix 1. Supplementation company and health claims on their products

| HEALTH CLAIM                    | SUPPLEMENTATION COMPANY                                                                                                                                                                                                                                                                                                                                                                                                                                                                                                                                                                                                                                                                                                                                                                                                                                                                                                                                                                                                                                                                                                                                                                                                                                                                                                                                                                                        |
|---------------------------------|----------------------------------------------------------------------------------------------------------------------------------------------------------------------------------------------------------------------------------------------------------------------------------------------------------------------------------------------------------------------------------------------------------------------------------------------------------------------------------------------------------------------------------------------------------------------------------------------------------------------------------------------------------------------------------------------------------------------------------------------------------------------------------------------------------------------------------------------------------------------------------------------------------------------------------------------------------------------------------------------------------------------------------------------------------------------------------------------------------------------------------------------------------------------------------------------------------------------------------------------------------------------------------------------------------------------------------------------------------------------------------------------------------------|
| <p><b>Improves strength</b></p> | <ul style="list-style-type: none"> <li>▪ HSN Raw</li> <li>▪ Natural Health UP</li> <li>▪ ON Optimum Nutrition (3 products)</li> <li>▪ Crown Sport Nutrition</li> <li>▪ Amix (2 products)</li> <li>▪ Quamtrax</li> <li>▪ MTX Active Nutrition</li> <li>▪ Probulus</li> <li>▪ Xcore Nutrition</li> <li>▪ Joe Weider Victory</li> <li>▪ Master ZX</li> <li>▪ Evlution Nutrition</li> <li>▪ Muscle Force</li> <li>▪ Tri-Nine</li> <li>▪ Big Protein</li> <li>▪ Creatine-Labs</li> <li>▪ Best Protein</li> <li>▪ Aminostar</li> <li>▪ 4+Nutrition</li> <li>▪ American Supplement</li> <li>▪ MP Muscle Pharm</li> <li>▪ Heal Secrets</li> <li>▪ ASN</li> <li>▪ Hypertrophy</li> <li>▪ Record Nutrition</li> <li>▪ Scitec Nutrition (2 products)</li> <li>▪ Firm Foods</li> <li>▪ Olimp Sport Nutrition</li> <li>▪ Okygen</li> <li>▪ Universal Nutrition</li> <li>▪ MuscleTech</li> <li>▪ Big Man</li> <li>▪ Gold Nutrition</li> <li>▪ Trec Nutrition (2 products)</li> <li>▪ QXN</li> <li>▪ Black Line</li> <li>▪ EU Nutrition</li> <li>▪ MET-Rx (2 products)</li> <li>▪ QNT</li> <li>▪ Applied Nutrition</li> <li>▪ Nutrytec (2 products)</li> <li>▪ MP Essentials</li> <li>▪ Natural Diet</li> <li>▪ OstroVit</li> <li>▪ MHP</li> <li>▪ Nutrex</li> <li>▪ Devotika</li> <li>▪ Scientiffic Nutrition</li> <li>▪ ActivLab (2 products)</li> <li>▪ MAN Sports</li> <li>▪ Vitobest NEO</li> <li>▪ GAT Sport</li> </ul> |

|                                                                 |                                                                                                                                                                                                                                                                                                                                                                                                                                                                                                                                                                                                                                                                                                                                                                                                                                                                                                                                                                                                                                                                          |
|-----------------------------------------------------------------|--------------------------------------------------------------------------------------------------------------------------------------------------------------------------------------------------------------------------------------------------------------------------------------------------------------------------------------------------------------------------------------------------------------------------------------------------------------------------------------------------------------------------------------------------------------------------------------------------------------------------------------------------------------------------------------------------------------------------------------------------------------------------------------------------------------------------------------------------------------------------------------------------------------------------------------------------------------------------------------------------------------------------------------------------------------------------|
|                                                                 | <ul style="list-style-type: none"> <li>▪ AllMax Nutrition</li> <li>▪ Haya Labs</li> <li>▪ Life PRO</li> <li>▪ Genetix Labs</li> <li>▪ OWN PWR</li> <li>▪ EAFit</li> <li>▪ Vitobest</li> <li>▪ FitWhey</li> <li>▪ Elite PRO</li> <li>▪ Onnit</li> <li>▪ BPI Sports</li> <li>▪ Evogen</li> <li>▪ Sheer Strength Labs</li> <li>▪ BioChem</li> <li>▪ Named Sport</li> </ul>                                                                                                                                                                                                                                                                                                                                                                                                                                                                                                                                                                                                                                                                                                  |
| <p style="text-align: center;"><b>Increases muscle mass</b></p> | <ul style="list-style-type: none"> <li>▪ HSN Raw</li> <li>▪ Natural Health UP</li> <li>▪ ON Optimum Nutrition (3 products)</li> <li>▪ Qualnat</li> <li>▪ Crown Sport Nutrition</li> <li>▪ Amix (2 products)</li> <li>▪ Starlabs Nutrition</li> <li>▪ MTX Active Nutrition</li> <li>▪ Xcore Nutrition</li> <li>▪ Abs</li> <li>▪ Evlution Nutrition</li> <li>▪ JeaKen</li> <li>▪ Muscle Force</li> <li>▪ Tri-Nine</li> <li>▪ FSA Sports Nutrition</li> <li>▪ Creatine-Labs</li> <li>▪ Best Protein</li> <li>▪ Aminostar</li> <li>▪ B4Fit</li> <li>▪ Vitobest (2 products)</li> <li>▪ Just Aid</li> <li>▪ MRM</li> <li>▪ Multipower</li> <li>▪ MP Muscle Pharm</li> <li>▪ Heal Secrets</li> <li>▪ Beverly Nutrition</li> <li>▪ Lamberts</li> <li>▪ ASN</li> <li>▪ Hypertropy</li> <li>▪ Record Nutrition</li> <li>▪ Scitec Nutrition</li> <li>▪ Firm Foods</li> <li>▪ Okygen</li> <li>▪ Nutrend</li> <li>▪ Now Sports</li> <li>▪ Muscle Tech</li> <li>▪ Pure Nutrition</li> <li>▪ Big Man</li> <li>▪ Gold Nutrition</li> <li>▪ Black Line</li> <li>▪ GoNutrition</li> </ul> |

|                                      |                                                                                                                                                                                                                                                                                                                                                                                                                                                                                                                                                                                                                                                                         |
|--------------------------------------|-------------------------------------------------------------------------------------------------------------------------------------------------------------------------------------------------------------------------------------------------------------------------------------------------------------------------------------------------------------------------------------------------------------------------------------------------------------------------------------------------------------------------------------------------------------------------------------------------------------------------------------------------------------------------|
|                                      | <ul style="list-style-type: none"> <li>▪ Cellucor</li> <li>▪ EU Nutrition</li> <li>▪ MET-Rx (2 produits)</li> <li>▪ QNT</li> <li>▪ Applied Nutrition</li> <li>▪ Nutrytec (3 produits)</li> <li>▪ MP Essentials</li> <li>▪ Natural Diet</li> <li>▪ OstroVit</li> <li>▪ Nutrex</li> <li>▪ Devotika</li> <li>▪ Scientific Nutrition</li> <li>▪ Iron Supplement</li> <li>▪ ActivLab (2 produits)</li> <li>▪ Vitobest NEO</li> <li>▪ AllMax Nutrition (2 produits)</li> <li>▪ EAFit</li> <li>▪ Trec Nutrition</li> <li>▪ FitWhey</li> <li>▪ Onnit</li> <li>▪ SCI-MX</li> <li>▪ BPI Sports</li> <li>▪ Evogen</li> <li>▪ Sheer Strength Labs</li> <li>▪ Named Sport</li> </ul> |
| <b>Promotes cellular hydration</b>   | <ul style="list-style-type: none"> <li>▪ HSN Raw</li> <li>▪ Xcore Nutrition</li> <li>▪ Scitec Nutrition (2 produits)</li> <li>▪ Universal Nutrition</li> <li>▪ Muscle Tech</li> <li>▪ Cellucor</li> <li>▪ Natural Diet</li> <li>▪ Amix</li> <li>▪ Vitobest NEO</li> <li>▪ 3XL Nutrition</li> <li>▪ Haya Labs</li> <li>▪ Trec Nutrition</li> </ul>                                                                                                                                                                                                                                                                                                                       |
| <b>Enhances physical performance</b> | <ul style="list-style-type: none"> <li>▪ HSN Raw</li> <li>▪ Vegavero Sport</li> <li>▪ SanaExpert</li> <li>▪ Natural Health UP</li> <li>▪ MyProtein (6 produits)</li> <li>▪ Scitec Nutrition (3 produits)</li> <li>▪ Qualnat</li> <li>▪ Amix</li> <li>▪ BioTech USA</li> <li>▪ Prozis (5 produits)</li> <li>▪ Xtraze</li> <li>▪ Starlabs Nutrition</li> <li>▪ The Protein Works</li> <li>▪ Universal Nutrition (2 produits)</li> <li>▪ Xcore Nutrition</li> <li>▪ Joe Weider Victory</li> <li>▪ Olimp Sport Nutrition (6 produits)</li> <li>▪ Quamtrax</li> <li>▪ Abs</li> </ul>                                                                                         |

- Evlution Nutrition
- Trec Nutrition (3 produits)
- SimplyGo
- Yamamoto Nutrition (2 produits)
- HSN Store
- LEAN Active
- JeaKen
- MyVitamins
- Infisport
- Amando Pérez
- Muscle Force
- Nu3
- Tri-Nine
- FSA Sports Nutrition
- Protein Buzz
- Big Protein
- Jarrow Formulas
- Aminostar
- Bodybuilding Warehouse
- 4+Nutrition
- Just Aid
- Multipower
- Nutrend (3 produits)
- MP Muscle Pharm
- Dymatize
- Heal Secrets
- Beverly Nutrition
- NutriSport
- ESN
- Hypertrophy
- Reflex Nutrition
- Tropicana
- Hero Tech Nutrition
- Ares Nutrition
- Best Body Nutrition
- Raw Physique
- Grenade
- Now Sports
- Pure Nutrition
- Isopure
- Black Line
- Aptonia (2 produits)
- MET-Rx (2 produits)
- Applied Nutrition
- Etixx
- Nutrytec (3 produits)
- Efectiv Nutrition
- MP Essentials
- Natural Diet
- OstroVit
- MHP
- Nutrex
- Scientiffic Nutrition
- Iron Supplement
- ActivLab
- MAN Sports

|                                                |                                                                                                                                                                                                                                                                                                                                                                                                                                                                                                                               |
|------------------------------------------------|-------------------------------------------------------------------------------------------------------------------------------------------------------------------------------------------------------------------------------------------------------------------------------------------------------------------------------------------------------------------------------------------------------------------------------------------------------------------------------------------------------------------------------|
|                                                | <ul style="list-style-type: none"> <li>▪ Muscle Tech</li> <li>▪ GAT Sport</li> <li>▪ Bulk Powders</li> <li>▪ Galvanize Nutrition</li> <li>▪ Everlast (2 products)</li> <li>▪ QNT</li> <li>▪ 3XL Nutrition</li> <li>▪ AllMax Nutrition</li> <li>▪ Haya Labs</li> <li>▪ Genetix Labs</li> <li>▪ OWN PWR (2 products)</li> <li>▪ Vitobest</li> <li>▪ Elite PRO</li> <li>▪ Motion Nutrition</li> <li>▪ Reflex XFT</li> <li>▪ Onnit</li> <li>▪ Named Sport</li> </ul>                                                              |
| <b>Helps the growth of bones and cartilage</b> | <ul style="list-style-type: none"> <li>▪ Fairvital</li> </ul>                                                                                                                                                                                                                                                                                                                                                                                                                                                                 |
| <b>Supports weight loss</b>                    | <ul style="list-style-type: none"> <li>▪ Natural Health UP</li> <li>▪ Record Nutrition</li> </ul>                                                                                                                                                                                                                                                                                                                                                                                                                             |
| <b>Increases physical resistance</b>           | <ul style="list-style-type: none"> <li>▪ Qualnat</li> <li>▪ Probulus</li> <li>▪ Best Protein</li> <li>▪ American Supplement</li> <li>▪ Multipower</li> <li>▪ Record Nutrition</li> <li>▪ Hero Tech Nutrition</li> <li>▪ Okygen</li> <li>▪ Universal Nutrition</li> <li>▪ Muscle Tech</li> <li>▪ Black Line</li> <li>▪ GoNutrition</li> <li>▪ Cellucor</li> <li>▪ EU Nutrition</li> <li>▪ Applied Nutrition</li> <li>▪ OstroVit</li> <li>▪ ActivLab</li> <li>▪ Haya Labs</li> <li>▪ Vitobest</li> <li>▪ Named Sport</li> </ul> |
| <b>Increases power</b>                         | <ul style="list-style-type: none"> <li>▪ ON Optimum Nutrition (2 products)</li> <li>▪ Crown Sport Nutrition</li> <li>▪ Amix</li> <li>▪ Starlabs Nutrition</li> <li>▪ Probulus</li> <li>▪ Master ZX</li> <li>▪ LEAN Active</li> <li>▪ Tri-Nine</li> <li>▪ Big Protein</li> <li>▪ 4+Nutrition</li> <li>▪ B4Fit</li> <li>▪ Vitobest (2 products)</li> <li>▪ American Supplement</li> <li>▪ MRM</li> <li>▪ MP Muscle Pharm</li> </ul>                                                                                             |

|                                                                   |                                                                                                                                                                                                                                                                                                                                                                                                                                                                                                                                                                                                                                                            |
|-------------------------------------------------------------------|------------------------------------------------------------------------------------------------------------------------------------------------------------------------------------------------------------------------------------------------------------------------------------------------------------------------------------------------------------------------------------------------------------------------------------------------------------------------------------------------------------------------------------------------------------------------------------------------------------------------------------------------------------|
|                                                                   | <ul style="list-style-type: none"> <li>▪ Scitec Nutrition (2 produits)</li> <li>▪ Firm Foods</li> <li>▪ Big Man</li> <li>▪ QXN</li> <li>▪ Cellucor</li> <li>▪ EU Nutrition</li> <li>▪ MET-Rx (2 produits)</li> <li>▪ Applied Nutrition</li> <li>▪ MP Essentials</li> <li>▪ Nutrex</li> <li>▪ Devotika</li> <li>▪ Nutrytec</li> <li>▪ MAN Sports</li> <li>▪ Vitobest NEO</li> <li>▪ OWN PWR</li> <li>▪ EAFit</li> <li>▪ Trec Nutrition</li> <li>▪ Elite PRO</li> <li>▪ BPI Sports</li> <li>▪ Evogen</li> <li>▪ Sheer Strength Labs</li> </ul>                                                                                                               |
| <b>Enhances physical performance in adults over the age of 55</b> | <ul style="list-style-type: none"> <li>▪ SimplyGo</li> <li>▪ HSN Store</li> </ul>                                                                                                                                                                                                                                                                                                                                                                                                                                                                                                                                                                          |
| <b>Improves energy availability</b>                               | <ul style="list-style-type: none"> <li>▪ Vegavero Sport</li> <li>▪ Qualnat</li> <li>▪ BSN</li> <li>▪ Universal Nutrition (2 produits)</li> <li>▪ Xcore Nutrition</li> <li>▪ JeaKen</li> <li>▪ Nu3</li> <li>▪ Too Shaped</li> <li>▪ Best Protein</li> <li>▪ Vitobest (2 produits)</li> <li>▪ American Supplement</li> <li>▪ Just Aid</li> <li>▪ Olimp Sport Nutrition</li> <li>▪ Record Nutrition</li> <li>▪ Scitec Nutrition (2 produits)</li> <li>▪ Firm Foods</li> <li>▪ Okygen</li> <li>▪ QXN</li> <li>▪ Cellucor</li> <li>▪ Nutrytec</li> <li>▪ Scientiffic Nutrition</li> <li>▪ MAN Sports</li> <li>▪ 3XL Nutrition</li> <li>▪ Named Sport</li> </ul> |
| <b>Promotes the replacement of creatine stores</b>                | <ul style="list-style-type: none"> <li>▪ BSN</li> <li>▪ Applied Nutrition</li> <li>▪ Vitobest</li> </ul>                                                                                                                                                                                                                                                                                                                                                                                                                                                                                                                                                   |
| <b>Replenishes muscle glycogen stores</b>                         | <ul style="list-style-type: none"> <li>▪ MTX Active Nutrition</li> <li>▪ Scitec Nutrition</li> </ul>                                                                                                                                                                                                                                                                                                                                                                                                                                                                                                                                                       |
| <b>Improves defenses or promotes greater protection</b>           | <ul style="list-style-type: none"> <li>▪ Fairvital</li> <li>▪ Muscle Tech</li> </ul>                                                                                                                                                                                                                                                                                                                                                                                                                                                                                                                                                                       |
| <b>Promotes gastric emptying</b>                                  | <ul style="list-style-type: none"> <li>▪ Scientiffic Nutrition</li> </ul>                                                                                                                                                                                                                                                                                                                                                                                                                                                                                                                                                                                  |

|                                                                                                         |                                                                                                                                                                                                                                                                                                                                                                                                                                                                                                                                                                                                                                                                                                                                                                                                                                                                                                                                                                                                                                                                                                                                                                                             |
|---------------------------------------------------------------------------------------------------------|---------------------------------------------------------------------------------------------------------------------------------------------------------------------------------------------------------------------------------------------------------------------------------------------------------------------------------------------------------------------------------------------------------------------------------------------------------------------------------------------------------------------------------------------------------------------------------------------------------------------------------------------------------------------------------------------------------------------------------------------------------------------------------------------------------------------------------------------------------------------------------------------------------------------------------------------------------------------------------------------------------------------------------------------------------------------------------------------------------------------------------------------------------------------------------------------|
| <p align="center"><b>Increases speed</b></p>                                                            | <ul style="list-style-type: none"> <li>▪ MTX Active Nutrition</li> <li>▪ Big Protein</li> <li>▪ Hero Tech Nutrition</li> <li>▪ Scientiffic Nutrition</li> <li>▪ Vitobest NEO</li> </ul>                                                                                                                                                                                                                                                                                                                                                                                                                                                                                                                                                                                                                                                                                                                                                                                                                                                                                                                                                                                                     |
| <p align="center"><b>Improves brain capacities</b></p>                                                  | <ul style="list-style-type: none"> <li>▪ Fairvital</li> <li>▪ Tri-Nine</li> </ul>                                                                                                                                                                                                                                                                                                                                                                                                                                                                                                                                                                                                                                                                                                                                                                                                                                                                                                                                                                                                                                                                                                           |
| <p align="center"><b>Promotes cardiovascular health</b></p>                                             | <ul style="list-style-type: none"> <li>▪ Scitec Nutrition</li> <li>▪ Scientiffic Nutrition</li> </ul>                                                                                                                                                                                                                                                                                                                                                                                                                                                                                                                                                                                                                                                                                                                                                                                                                                                                                                                                                                                                                                                                                       |
| <p align="center"><b>Improves blood glucose</b></p>                                                     | <ul style="list-style-type: none"> <li>▪ Scitec Nutrition</li> </ul>                                                                                                                                                                                                                                                                                                                                                                                                                                                                                                                                                                                                                                                                                                                                                                                                                                                                                                                                                                                                                                                                                                                        |
| <p align="center"><b>Improves recovery, prevents muscle fatigue or promotes muscle regeneration</b></p> | <ul style="list-style-type: none"> <li>▪ HSN Raw</li> <li>▪ Natural Health UP</li> <li>▪ Qualnat</li> <li>▪ Crown Sport Nutrition</li> <li>▪ Amix</li> <li>▪ Quamtrax</li> <li>▪ MTX Active Nutrition</li> <li>▪ Probulus</li> <li>▪ Universal Nutrition (2 produits)</li> <li>▪ Joe Weider Victory</li> <li>▪ Big Protein</li> <li>▪ Creatine-Labs</li> <li>▪ Aminostar</li> <li>▪ B4Fit</li> <li>▪ Vitobest (2 produits)</li> <li>▪ American Supplement</li> <li>▪ Just Aid</li> <li>▪ MRM</li> <li>▪ Olimp Sport Nutrition</li> <li>▪ NutriSport</li> <li>▪ Lamberts</li> <li>▪ Weider (2 produits)</li> <li>▪ Scitec Nutrition</li> <li>▪ Firm Foods</li> <li>▪ Okygen</li> <li>▪ Muscle Tech</li> <li>▪ QXN</li> <li>▪ Black Line</li> <li>▪ GoNutrition</li> <li>▪ EU Nutrition</li> <li>▪ MET-Rx (2 produits)</li> <li>▪ Applied Nutrition</li> <li>▪ Nutrytec (2 produits)</li> <li>▪ Scientiffic Nutrition</li> <li>▪ Vitobest NEO</li> <li>▪ ActivLab</li> <li>▪ GAT Sport</li> <li>▪ AllMax Nutrition</li> <li>▪ Haya Labs</li> <li>▪ Life PRO</li> <li>▪ EAFit</li> <li>▪ Trec Nutrition</li> <li>▪ BPI Sports</li> <li>▪ Sheer Strength Labs</li> <li>▪ Named Sport</li> </ul> |
